# Supplementary material for: The Cell Surface Proteome of Human Mesenchymal Stromal Cells
Source: PLoS One. 2011 May 26;6(5):e20399. doi: 10.1371/journal.pone.0020399 (PMC3102717; doi:10.1371/journal.pone.0020399)
Supplement: Table S3 — List of hESC and hMSC cell surface proteins compared in this study. (XLS) [file pone.0020399.s003.xls]

## Sheet: Sheet1
Accession	Description
Plasma membrane proteins in hESC and hMSC
hESC (Dormeyer et al., 2008):242				Also identified on murine ESCs by Gu et al., 2010 using biotinylation
hMSC (Our study): 171 (incl. 2 MHC molecules)
Common (74)
Accession	16 Cell Adhesion Molecules
P56199	CD49a. Integrin alpha-1 OS=Homo sapiens GN=ITGA1
P17301	CD49b. Integrin alpha-2 OS=Homo sapiens GN=ITGA2
P26006	CD49c. Integrin alpha-3 OS=Homo sapiens GN=ITGA3
P08648	CD49e. Integrin alpha-5 OS=Homo sapiens GN=ITGA5
Q13683	Integrin alpha-7 OS=Homo sapiens GN=ITGA7
P06756	CD51. Integrin alpha-V OS=Homo sapiens GN=ITGAV
P05556	CD29. Integrin beta-1 OS=Homo sapiens GN=ITGB1
P18084	Integrin beta-5 OS=Homo sapiens GN=ITGB5
P55290	Cadherin-13 OS=Homo sapiens GN=CDH13
P19022	CD325. Cadherin-2 OS=Homo sapiens GN=CDH2
Q13641	Trophoblast glycoprotein OS=Homo sapiens GN=TPBG
P50895	CD239. Lutheran blood group glycoprotein OS=Homo sapiens GN=BCAM
P16070	CD44 antigen OS=Homo sapiens GN=CD44
P43121	CD146. Cell surface glycoprotein MUC18 OS=Homo sapiens GN=MCAM
Q13740	CD166 antigen OS=Homo sapiens GN=ALCAM
Q92859	Neogenin OS=Homo sapiens GN=NEO1
	10 Signaling receptors
Q13308	Tyrosine-protein kinase-like 7 OS=Homo sapiens GN=PTK7
Q13332	Receptor-type tyrosine-protein phosphatase S OS=Homo sapiens GN=PTPRS
P54760	Ephrin type-B receptor 4 OS=Homo sapiens GN=EPHB4
P29317	Ephrin type-A receptor 2 OS=Homo sapiens GN=EPHA2
Q9BTV4	Transmembrane protein 43 OS=Homo sapiens GN=TMEM43
Q92542	Nicastrin OS=Homo sapiens GN=NCSTN
P35613	CD147. Basigin OS=Homo sapiens GN=BSG
O00264	Membrane-associated progesterone receptor component 1 OS=Homo sapiens GN=PGRMC1
O15173	Membrane-associated progesterone receptor component 2 OS=Homo sapiens GN=PGRMC2
P00533	Epidermal growth factor receptor OS=Homo sapiens GN=EGFR
	16 Transporters
P05023	Sodium/potassium-transporting ATPase subunit alpha-1 OS=Homo sapiens GN=ATP1A1
P05026	Sodium/potassium-transporting ATPase subunit beta-1 OS=Homo sapiens GN=ATP1B1
P54709	Sodium/potassium-transporting ATPase subunit beta-3 OS=Homo sapiens GN=ATP1B3
P21796	Voltage-dependent anion-selective channel protein 1 OS=Homo sapiens GN=VDAC1
P45880	Voltage-dependent anion-selective channel protein 2 OS=Homo sapiens GN=VDAC2
Q9Y277	Voltage-dependent anion-selective channel protein 3 OS=Homo sapiens GN=VDAC3
P54289	Voltage-dependent calcium channel subunit alpha-2/delta-1 OS=Homo sapiens GN=CACNA2D1
Q8WWI5	Choline transporter-like protein 1 OS=Homo sapiens GN=SLC44A1
Q8IWA5	Choline transporter-like protein 2 OS=Homo sapiens GN=SLC44A2
P20020	Plasma membrane calcium-transporting ATPase 1 OS=Homo sapiens GN=ATP2B1
P23634	Plasma membrane calcium-transporting ATPase 4 OS=Homo sapiens GN=ATP2B4
P33527	Multidrug resistance-associated protein 1 OS=Homo sapiens GN=ABCC1
Q15758	Neutral amino acid transporter B(0) OS=Homo sapiens GN=SLC1A5
Q01650	Large neutral amino acids transporter small subunit 1 OS=Homo sapiens GN=SLC7A5
Q8NB49	Probable phospholipid-transporting ATPase IG OS=Homo sapiens GN=ATP11C
P08195	CD98. 4F2 cell-surface antigen heavy chain OS=Homo sapiens GN=SLC3A2
	5 Receptors
Q07954	Prolow-density lipoprotein receptor-related protein 1 OS=Homo sapiens GN=LRP1
P51572	B-cell receptor-associated protein 31 OS=Homo sapiens GN=BCAP31
P15529	CD46. Membrane cofactor protein OS=Homo sapiens GN=CD46
P02786	CD71. Transferrin receptor protein 1 OS=Homo sapiens GN=TFRC
Q92692	CD112. Poliovirus receptor-related protein 2 OS=Homo sapiens GN=PVRL2
	2 Proteoglycans
O75487	Glypican-4 OS=Homo sapiens GN=GPC4
P34741	Syndecan-2 OS=Homo sapiens GN=SDC2
	4 Enzymes
O14672	ADAM 10 OS=Homo sapiens GN=ADAM10
P50281	Matrix metalloproteinase-14 OS=Homo sapiens GN=MMP14
P08473	Neprilysin OS=Homo sapiens GN=MME
Q15262	Receptor-type tyrosine-protein phosphatase kappa OS=Homo sapiens GN=PTPRK
	4 Tetraspanins + 2 GPI anchored proteins
Q04941	Proteolipid protein 2 OS=Homo sapiens GN=PLP2
P21926	CD9 antigen OS=Homo sapiens GN=CD9
P08962	CD63 antigen OS=Homo sapiens GN=CD63
P60033	CD81 antigen OS=Homo sapiens GN=CD81
	GPI anchored proteins
P13987	CD59 glycoprotein OS=Homo sapiens GN=CD59
P04216	CD90. Thy-1 membrane glycoprotein OS=Homo sapiens GN=THY1
	9 Others
Q16585	Beta-sarcoglycan OS=Homo sapiens GN=SGCB
Q14108	Lysosome membrane protein 2 OS=Homo sapiens GN=SCARB2
P11279	Lysosome-associated membrane glycoprotein 1 OS=Homo sapiens GN=LAMP1
Q5ZPR3	CD276 antigen OS=Homo sapiens GN=CD276
Q969P0	CD316. Immunoglobulin superfamily member 8 OS=Homo sapiens GN=IGSF8
Q00765	Receptor expression-enhancing protein 5 OS=Homo sapiens GN=REEP5
Q15836	Vesicle-associated membrane protein 3 OS=Homo sapiens GN=VAMP3
O95292	Vesicle-associated membrane protein-associated protein B/C OS=Homo sapiens GN=VAPB
Q12846	Syntaxin-4 OS=Homo sapiens GN=STX4
	2 Cell surface associated proteins
P50454	Serpin H1 OS=Homo sapiens GN=SERPINH1
Q14118	Dystroglycan OS=Homo sapiens GN=DAG1
	1 Intracellular proteins associated with transmembrane proteins
Q53EP0	Fibronectin type III domain-containing protein 3B OS=Homo sapiens GN=FNDC3B
	1 Intracellular proteins involved in signaling
P35222	Catenin beta-1 OS=Homo sapiens GN=CTNNB1
	2 MHC molecules
	HLA class I histocompatibility antigen, A GN=HLA-A
	HLA class I histocompatibility antigen, C GN=HLA-C
Unique hMSCs (97)
	17 Cell Adhesion Molecules
Q9UKX5	Integrin alpha-11 OS=Homo sapiens GN=ITGA11
P53708	Integrin alpha-8 OS=Homo sapiens GN=ITGA8
P55287	Cadherin-11 OS=Homo sapiens GN=CDH11
Q9UM22	Mammalian ependymin-related protein 1 OS=Homo sapiens GN=EPDR1
Q9Y639	Neuroplastin OS=Homo sapiens GN=NPTN
Q9H6B4	Adipocyte adhesion molecule OS=Homo sapiens GN=ACAM
P19320	CD106. Vascular cell adhesion protein 1 OS=Homo sapiens GN=VCAM1
O94856	Neurofascin OS=Homo sapiens GN=NFASC
Q8ND94	LRRN4 C-terminal-like protein OS=Homo sapiens GN=LRRN4CL
P05362	CD54. Intercellular adhesion molecule 1 OS=Homo sapiens GN=ICAM1
Q08431	Lactadherin OS=Homo sapiens GN=MFGE8
Q9BX67	Junctional adhesion molecule C OS=Homo sapiens GN=JAM3
P05106	CD61. Integrin beta-3 OS=Homo sapiens GN=ITGB3
P14209	CD99 antigen OS=Homo sapiens GN=CD99
O14498	Immunoglobulin superfamily containing leucine-rich repeat protein OS=Homo sapiens GN=ISLR
Q08722	CD47. Leukocyte surface antigen CD47 OS=Homo sapiens GN=CD47
P48960	CD97 antigen OS=Homo sapiens GN=CD97
	16 Signaling receptors
P09619	CD140b. Beta-type platelet-derived growth factor receptor OS=Homo sapiens GN=PDGFRB
Q15582	Transforming growth factor-beta-induced protein ig-h3 OS=Homo sapiens GN=TGFBI
P36897	TGF-beta receptor type-1 OS=Homo sapiens GN=TGFBR1
Q14165	Malectin OS=Homo sapiens GN=MLEC
P25445	CD95. Tumor necrosis factor receptor superfamily member 6 OS=Homo sapiens GN=FAS
P78324	CD172a. Tyrosine-protein phosphatase non-receptor type substrate 1 OS=Homo sapiens GN=SIRPA
Q16832	Discoidin domain-containing receptor 2 OS=Homo sapiens GN=DDR2
P98172	Ephrin-B1 OS=Homo sapiens GN=EFNB1
Q9UHN6	Transmembrane protein 2 OS=Homo sapiens GN=TMEM2
Q6DD88	Atlastin-3 OS=Homo sapiens GN=ATL3
Q96J84	Kin of IRRE-like protein 1 OS=Homo sapiens GN=KIRREL
Q96AG4	Leucine-rich repeat-containing protein 59 OS=Homo sapiens GN=LRRC59
P57088	Transmembrane protein 33 OS=Homo sapiens GN=TMEM33
P17813	CD105. Endoglin OS=Homo sapiens GN=ENG
P42892	Endothelin-converting enzyme 1 OS=Homo sapiens GN=ECE1
Q9P0L0	Vesicle-associated membrane protein-associated protein A OS=Homo sapiens GN=VAPA
	3 Transporters
O00299	Chloride intracellular channel protein 1 OS=Homo sapiens GN=CLIC1
Q9Y696	Chloride intracellular channel protein 4 OS=Homo sapiens GN=CLIC4
Q9BQS7	Hephaestin OS=Homo sapiens GN=HEPH
	8 Receptors
Q9UBG0	C-type mannose receptor 2 OS=Homo sapiens GN=MRC2
P17342	Atrial natriuretic peptide clearance receptor OS=Homo sapiens GN=NPR3
P20594	Atrial natriuretic peptide receptor B OS=Homo sapiens GN=NPR2
Q9H6X2	Anthrax toxin receptor 1 OS=Homo sapiens GN=ANTXR1
P58335	Anthrax toxin receptor 2 OS=Homo sapiens GN=ANTXR2
Q9UNN8	Endothelial protein C receptor OS=Homo sapiens GN=PROCR
P15151	CD155. Poliovirus receptor OS=Homo sapiens GN=PVR
O14786	CD304. Neuropilin-1 OS=Homo sapiens GN=NRP1
	2 Proteoglycans
P35052	Glypican-1 OS=Homo sapiens GN=GPC1
Q6UVK1	Chondroitin sulfate proteoglycan 4 OS=Homo sapiens GN=CSPG4
	8 Enzymes
Q5TFE4	5'-nucleotidase domain-containing protein 1 OS=Homo sapiens GN=NT5DC1
P49961	Ectonucleoside triphosphate diphosphohydrolase 1 OS=Homo sapiens GN=ENTPD1
P15144	CD13. Aminopeptidase N OS=Homo sapiens GN=ANPEP
Q9C0E8	Protein lunapark OS=Homo sapiens GN=LNP
P21589	5'-nucleotidase OS=Homo sapiens GN=NT5E
Q9NYL4	FK506-binding protein 11 OS=Homo sapiens GN=FKBP11
Q96N66	Membrane-bound O-acyltransferase domain-containing protein 7 OS=Homo sapiens GN=MBOAT7
Q9HDC9	Adipocyte plasma membrane-associated protein OS=Homo sapiens GN=APMAP
	2 Tetraspanins + 5 GPI anchored proteins
Q96S97	Myeloid-associated differentiation marker OS=Homo sapiens GN=MYADM
P48509	CD151 antigen OS=Homo sapiens GN=CD151
	GPI anchored proteins
Q9Y625	Glypican-6 OS=Homo sapiens GN=GPC6
Q969N2	GPI transamidase component PIG-T OS=Homo sapiens GN=PIGT
Q6YHK3	CD109 antigen OS=Homo sapiens GN=CD109
Q7Z3B1	Neuronal growth regulator 1 OS=Homo sapiens GN=NEGR1
Q13449	Limbic system-associated membrane protein OS=Homo sapiens GN=LSAMP
	8 Others
Q92629	Delta-sarcoglycan OS=Homo sapiens GN=SGCD
O43556	Epsilon-sarcoglycan OS=Homo sapiens GN=SGCE
Q14699	Raftlin OS=Homo sapiens GN=RFTN1
Q9UH62	Armadillo repeat-containing X-linked protein 3 OS=Homo sapiens GN=ARMCX3
Q6NUQ4	Transmembrane protein 214 OS=Homo sapiens GN=TMEM214
Q9BRK3	Matrix-remodeling-associated protein 8 OS=Homo sapiens GN=MXRA8
Q9HCU0	CD248. Endosialin OS=Homo sapiens GN=CD248
Q9BQJ4	Transmembrane protein 47 OS=Homo sapiens GN=TMEM47
	16 Cell surface associated proteins
P02452	Collagen alpha-1(I) chain OS=Homo sapiens GN=COL1A1
P12109	Collagen alpha-1(VI) chain OS=Homo sapiens GN=COL6A1
P27658	Collagen alpha-1(VIII) chain OS=Homo sapiens GN=COL8A1
P12110	Collagen alpha-2(VI) chain OS=Homo sapiens GN=COL6A2
P12111	Collagen alpha-3(VI) chain OS=Homo sapiens GN=COL6A3
P09382	Galectin-1 OS=Homo sapiens GN=LGALS1
P17931	Galectin-3 OS=Homo sapiens GN=LGALS3
P47929	Galectin-7 OS=Homo sapiens GN=LGALS7
O75718	Cartilage-associated protein OS=Homo sapiens GN=CRTAP
P02751	Fibronectin OS=Homo sapiens GN=FN1
P48594	Serpin B4 OS=Homo sapiens GN=SERPINB4
P35237	Serpin B6 OS=Homo sapiens GN=SERPINB6
P51858	Hepatoma-derived growth factor OS=Homo sapiens GN=HDGF
Q16270	Insulin-like growth factor-binding protein 7 OS=Homo sapiens GN=IGFBP7
O43854	EGF-like repeat and discoidin I-like domain-containing protein 3 OS=Homo sapiens GN=EDIL3
P30626	Sorcin OS=Homo sapiens GN=SRI
	7 Intracellular proteins associated with transmembrane proteins
Q13884	Beta-1-syntrophin OS=Homo sapiens GN=SNTB1
Q13425	Beta-2-syntrophin OS=Homo sapiens GN=SNTB2
Q8WWI1	LIM domain only protein 7 OS=Homo sapiens GN=LMO7
Q9Y490	Talin-1 OS=Homo sapiens GN=TLN1
Q9Y3F4	Serine-threonine kinase receptor-associated protein OS=Homo sapiens GN=STRAP
Q9H4M9	EH domain-containing protein 1 OS=Homo sapiens GN=EHD1
Q08AF3	Schlafen family member 5 OS=Homo sapiens GN=SLFN5
	5 Intracellular proteins involved in signaling
P35221	Catenin alpha-1 OS=Homo sapiens GN=CTNNA1
O60716	Catenin delta-1 OS=Homo sapiens GN=CTNND1
O60763	General vesicular transport factor p115 OS=Homo sapiens GN=USO1
P14923	Junction plakoglobin OS=Homo sapiens GN=JUP
P46940	Ras GTPase-activating-like protein IQGAP1 OS=Homo sapiens GN=IQGAP1
Unique hESCs (168)
	Some adhesion molecules + CD markers
IPI00027422	Integrin beta-4	ITGB4
IPI00031821	Integral membrane protein 2B	ITM2B
IPI00013162	CD200	CD200
IPI00641251	CD320	CD320
IPI00018282	CD40	CD40
IPI00022933	CD74	CD74
IPI00027436	CD271	NGFR
IPI00012540	CD133. Prominin-1 precursor
IPI00006073	CD30. Isoform Long of Tumor necrosis factor receptor superfamily member 8 precursor	TNFRSF8
IPI00010277	CD266. Isoform 1 of Tumor necrosis factor receptor superfamily member 12A precursor	TNFRSF12A
IPI00220737	CD56. Isoform N-CAM 120 of Neural cell adhesion molecule 1, 120 kDa isoform precursor	NCAM1
IPI00027087	Isoform 1 of Neural cell adhesion molecule L1 precursor	L1CAM
	Others
IPI00006675	Multidrug resistance-associated protein 4	ABCC4
IPI00029219	Activin receptor type-1 precursor	ACVR1
IPI00288894	Isoform A of ADAM 17 precursor	ADAM17
IPI00440932	Isoform 1 of ADAM 9 precursor	ADAM9
IPI00031030	Isoform 1 of Amyloid-like protein 2 precursor	APLP2
IPI00006608	Isoform APP770 of Amyloid beta A4 protein precursor (Fragment)	APP
IPI00034277	Isoform A of Probable cation-transporting ATPase 13A1	ATP13A1
IPI00003021	Sodium/potassium-transporting ATPase alpha-2 chain precursor	ATP1A2
IPI00302840	Sodium/potassium-transporting ATPase alpha-3 chain	ATP1A3
IPI00440493	ATP synthase subunit alpha, mitochondrial precursor	ATP5A1
IPI00168884	Renin receptor precursor	ATP6AP2
IPI00000425	Vacuolar proton translocating ATPase 116 kDa subunit a isoform 2	ATP6V0A2
IPI00296992	AXL receptor tyrosine kinase isoform 1	AXL
IPI00299024	Brain acid soluble protein 1	BASP1
IPI00221233	B-cell receptor-associated protein 29	BCAP29
IPI00005731	Bone morphogenetic protein receptor type IA precursor	BMPR1A
IPI00026241	Bone marrow stromal antigen 2 precursor	BST2
IPI00000735	Tetraspanin-13	BZW2
IPI00016786	Isoform 2 of Cell division control protein 42 homolog precursor	CDC42
IPI00025861	Epithelial-cadherin precursor	CDH1
IPI00011088	Claudin-12	CLDN12
IPI00011084	Claudin-6	CLDN6
IPI00107357	Isoform 2 of Cleft lip and palate transmembrane protein 1	CLPTM1
IPI00166090	Isoform 1 of Crumbs protein homolog 3 precursor	CRB3
IPI00019146	Isoform 1 of Coxsackievirus and adenovirus receptor precursor	CXADR
IPI00183603	DC2 protein	DC2
IPI00419836	Isoform 1 of Discoidin, CUB and LCCL domain-containing protein 2 precursor	DCBLD2
IPI00001477	Isoform 1 of Epithelial discoidin domain-containing receptor 1 precursor	DDR1
IPI00021147	degenerative spermatocyte homolog 1, lipid desaturase	DEGS1
IPI00025846	Isoform 2A of Desmocollin-2 precursor	DSC2
IPI00028931	desmoglein 2 preproprotein	DSG2
IPI00020210	Dysferlin_v1	DYSF
IPI00294250	Ephrin type-A receptor 1 precursor	EPHA1
IPI00300384	Receptor tyrosine-protein kinase erbB-2 precursor	ERBB2
IPI00298285	Isoform 1 of Receptor tyrosine-protein kinase erbB-3 precursor	ERBB3
IPI00001754	Junctional adhesion molecule A precursor	F11R
IPI00183786	fatty acid desaturase 2	FADS2
IPI00031411	Cadherin-related tumor suppressor homolog precursor	FAT
IPI00021048	Isoform 1 of Myoferlin	FER1L3
IPI00005142	Isoform 1 of Basic fibroblast growth factor receptor 1 precursor	FGFR1
IPI00010680	Fibroblast growth factor receptor 2 precursor	FGFR2
IPI00386831	Hypothetical protein FLJ20674	FLJ20674
IPI00027438	Flotillin-1	FLOT1
IPI00029625	Flotillin-2	FLOT2
IPI00022344	Feline leukemia virus subgroup C receptor-related protein 1	FLVCR
IPI00107698	Fibroblast growth factor receptor substrate 2	FRS2
IPI00024012	Frizzled-7 precursor	FZD7
IPI00218487	Gap junction alpha-1 protein	GJA1
IPI00002946	Gap junction alpha-7 protein	GJA7
IPI00305551	Guanine nucleotide-binding protein subunit alpha-11	GNA11
IPI00027240	Guanine nucleotide-binding protein G(I)/G(S)/G(O) gamma-5 subunit precursor	GNG5
IPI00026881	Gastrin-releasing peptide receptor	GRPR
IPI00152441	Isoform 1 of Minor histocompatibility antigen H13	HM13
IPI00010808	Interferon-gamma receptor alpha chain precursor	IFNGR1
IPI00027232	Insulin-like growth factor 1 receptor precursor	IGF1R
IPI00289819	Cation-independent mannose-6-phosphate receptor precursor	IGF2R
IPI00016890	Similar to immunoglobulin superfamily, member 3 isoform 1	IGSF3
IPI00003813	Nectin-like protein 2	IGSF4
IPI00024053	ImmunoglobulIn superfamIly, member 9	IGSF9
IPI00218658	Isoform 2 of Inositol 1,4,5-trisphosphate receptor type 1	ITPR1
IPI00031545	Isoform Long of Inositol 1,4,5-trisphosphate receptor type 2	ITPR2
IPI00291607	Inositol 1,4,5-trisphosphate receptor type 3	ITPR3
IPI00183964	Hypothetical protein DKFZp434F0621	KIDINS220
IPI00022296	Mast/stem cell growth factor receptor precursor	KIT
IPI00394952	lymphocyte-specific protein tyrosine kinase precursor	LCK
IPI00000070	Low-density lipoprotein receptor precursor	LDLR
IPI00019068	BB1 protein	LENG4
IPI00017562	Isoform 2 of Latrophilin-2 precursor	LPHN2
IPI00306851	Low-density lipoprotein receptor-related protein 4 precursor	LRP4
IPI00005774	Isoform 1 of Low-density lipoprotein receptor-related protein 8 precursor	LRP8
IPI00409640	Isoform 1 of Lipolysis-stimulated lipoprotein receptor	LSR
IPI00025049	Cation-dependent mannose-6-phosphate receptor precursor	M6PR
IPI00029273	Isoform 1 of Hepatocyte growth factor receptor precursor	MET
IPI00472138	HLA class I histocompatibility antigen, B-58 alpha chain precursor	MICA
IPI00029819	Neurogenic locus notch homolog protein 3 precursor	NOTCH3
IPI00005107	Niemann-Pick C1 protein precursor	NPC1
IPI00003373	Occludin	OCLN
IPI00000024	Isoform 1 of Protocadherin-1 precursor	PCDH1
IPI00030618	protocadherin 18 precursor	PCDH18
IPI00001893	Isoform A of Protocadherin-7 precursor	PCDH7
IPI00299853	Protocadherin beta 16 precursor	PCDHB16
IPI00001432	Protocadherin beta 2 precursor	PCDHB2
IPI00001431	Protocadherin beta 3 precursor	PCDHB3
IPI00001428	Protocadherin beta 5 precursor	PCDHB5
IPI00003896	Isoform 1 of Protocadherin gamma B5 precursor	PCDHGB5
IPI00017334	Prohibitin	PHB
IPI00022543	GPI-anchor transamidase precursor	PIGK
IPI00004573	Polymeric-immunoglobulin receptor precursor	PIGR
IPI00299040	Polycystin-2	PKD2
IPI00005264	Isoform 2 of Plakophilin-2	PKP2
IPI00006644	Isoform 2 of Plexin-B1 precursor	PLXNB1
IPI00299116	Podocalyxin-like protein 1 precursor	PODXL
IPI00063234	PRKAR2A protein	PRKAR2A
IPI00022284	Major prion protein precursor	PRNP
IPI00011694	Trypsin-1 precursor	PRSS1
IPI00329538	Prostasin precursor	PRSS8
IPI00028077	Isoform 1 of Presenilin-1	PSEN1
IPI00297261	Tyrosine-protein phosphatase non-receptor type 1	PTPN1
IPI00032333	Isoform 1 of Receptor-type tyrosine-protein phosphatase alpha precursor	PTPRA
IPI00011642	Isoform 1 of Receptor-type tyrosine-protein phosphatase delta precursor	PTPRD
IPI00107831	Receptor-type tyrosine-protein phosphatase F precursor	PTPRF
IPI00011651	Receptor-type tyrosine-protein phosphatase gamma precursor	PTPRG
IPI00216283	Isoform Short of Receptor-type tyrosine-protein phosphatase zeta precursor	PTPRZ1
IPI00003648	Isoform Delta of Poliovirus receptor-related protein 1 precursor	PVRL1
IPI00022959	Isoform 1 of Poliovirus receptor-related protein 3 precursor	PVRL3
IPI00219798	Isoform 1 of Roundabout homolog 1 precursor	ROBO1
IPI00010405	Isoform Long of Tyrosine-protein kinase transmembrane receptor ROR1 precursor	ROR1
IPI00337584	Isoform 1 of Scavenger receptor class A member 3	SCARA3
IPI00023807	Semaphorin-4D precursor	SEMA4D
IPI00025257	Semaphorin-7A precursor	SEMA7A
IPI00410693	Isoform 1 of Plasminogen activator inhibitor 1 RNA-binding protein	SERBP1
IPI00031630	Melanocyte protein Pmel 17 precursor	SILV
IPI00022649	Isoform 1 of Solute carrier family 12 member 2	SLC12A2
IPI00220151	Isoform 2 of Solute carrier family 12 member 6	SLC12A6
IPI00387077	solute carrier family 12 (potassium/chloride transporters), member 9	SLC12A9
IPI00004279	Oligopeptide transporter, small intestine isoform	SLC15A1
IPI00024650	Monocarboxylate transporter 1	SLC16A1
IPI00015475	Excitatory amino acid transporter 3	SLC1A1
IPI00009504	Leukemia virus receptor 2	SLC20A2
IPI00219729	Mitochondrial 2-oxoglutarate/malate carrier protein	SLC25A11
IPI00107312	Isoform 1 of Solute carrier family 26 member 6	SLC26A6
IPI00220194	Solute carrier family 2, facilitated glucose transporter member 1	SLC2A1
IPI00003909	Solute carrier family 2, facilitated glucose transporter member 3	SLC2A3
IPI00002483	Zinc transporter 1	SLC30A1
IPI00465310	SLC30A5	SLC30A5
IPI00410034	Putative 40-9-1 protein	SLC38A2
IPI00014236	KIAA0062 protein	SLC39A14
IPI00387156	Isoform 2 of Sodium bicarbonate cotransporter 3	SLC4A7
IPI00007582	Sodium- and chloride-dependent creatine transporter 1	SLC6A8
IPI00027728	High-affinity cationic amino acid transporter 1	SLC7A1
IPI00295698	Cationic amino acid transporter 3	SLC7A3
IPI00296114	Large neutral amino acids transporter small subunit 2	SLC7A8
IPI00020060	Sodium/hydrogen exchanger 1	SLC9A1
IPI00010438	Isoform SNAP-23a of Synaptosomal-associated protein 23	SNAP23
IPI00022608	Sortilin-related receptor precursor	SORL1
IPI00027807	Isoform A of Somatostatin receptor type 2	SSTR2
IPI00001922	Suppressor of tumorigenicity protein 14	ST14
IPI00299063	Stromal interaction molecule 1 precursor	STIM1
IPI00219682	Erythrocyte band 7 integral membrane protein	STOM
IPI00220099	Isoform B of Syntaxin-3	STX3A
IPI00296215	Tumor-associated calcium signal transducer 1 precursor	TACSTD1
IPI00022748	Bax inhibitor 1	TEGT
IPI00217492	Receptor protein tyrosine kinase	TEK
IPI00007309	Mitochondrial import inner membrane translocase subunit Tim23	TIMM23
IPI00021985	Transmembrane 9 superfamily protein member 4	TM9SF4
IPI00151710	Transmembrane protein 16F	TMEM16F
IPI00413263	FLJ10315 protein	TMEM39B
IPI00006006	Transmembrane protein 63A	TMEM63A
IPI00289131	Transmembrane protein 8 precursor	TMEM8
IPI00030941	Tetraspanin-3	TSPAN3
IPI00027437	Tetraspanin-9	TSPAN9
IPI00030911	Vesicle-associated membrane protein 8	VAMP8
IPI00024273	Isoform Long of Very low-density lipoprotein receptor precursor	VLDLR
IPI00217110	XPR1 protein	XPR1
IPI00334657	Isoform 1 of Protein YIPF5	YIPF5
		Common
	Cell Adhesion	16
	Signaling receptors	10
	Transporters	16
	Receptors	5
	Proteoglycans	2
	Enzymes	4
	Tetraspanins + GPI anchored	6
	Others	9
	Cell surface associated	2
	Intracellular proteins associated with transmembrane proteins	1
	Intracellular proteins involved in signaling	1
	Total number of proteins	72
